# Supplementary material for: STAT3/5 Inhibitors Suppress Proliferation in Bladder Cancer and Enhance Oncolytic Adenovirus Therapy
Source: MDPI journal article supplement (doi:10.3390/ijms21031106), 2020-02-07
Supplement: s1 [file s1]

**Supplementary figure-S1:** JAK inhibition by specific inhibitors: Cells were treated with increasing concentrations of Ruxolitinib and cell viability was assessed by CellTiter-Blue® Cell Viability Assay 72 hours after treatment in a panel of bladder cancer cell lines: Error bars S.E.

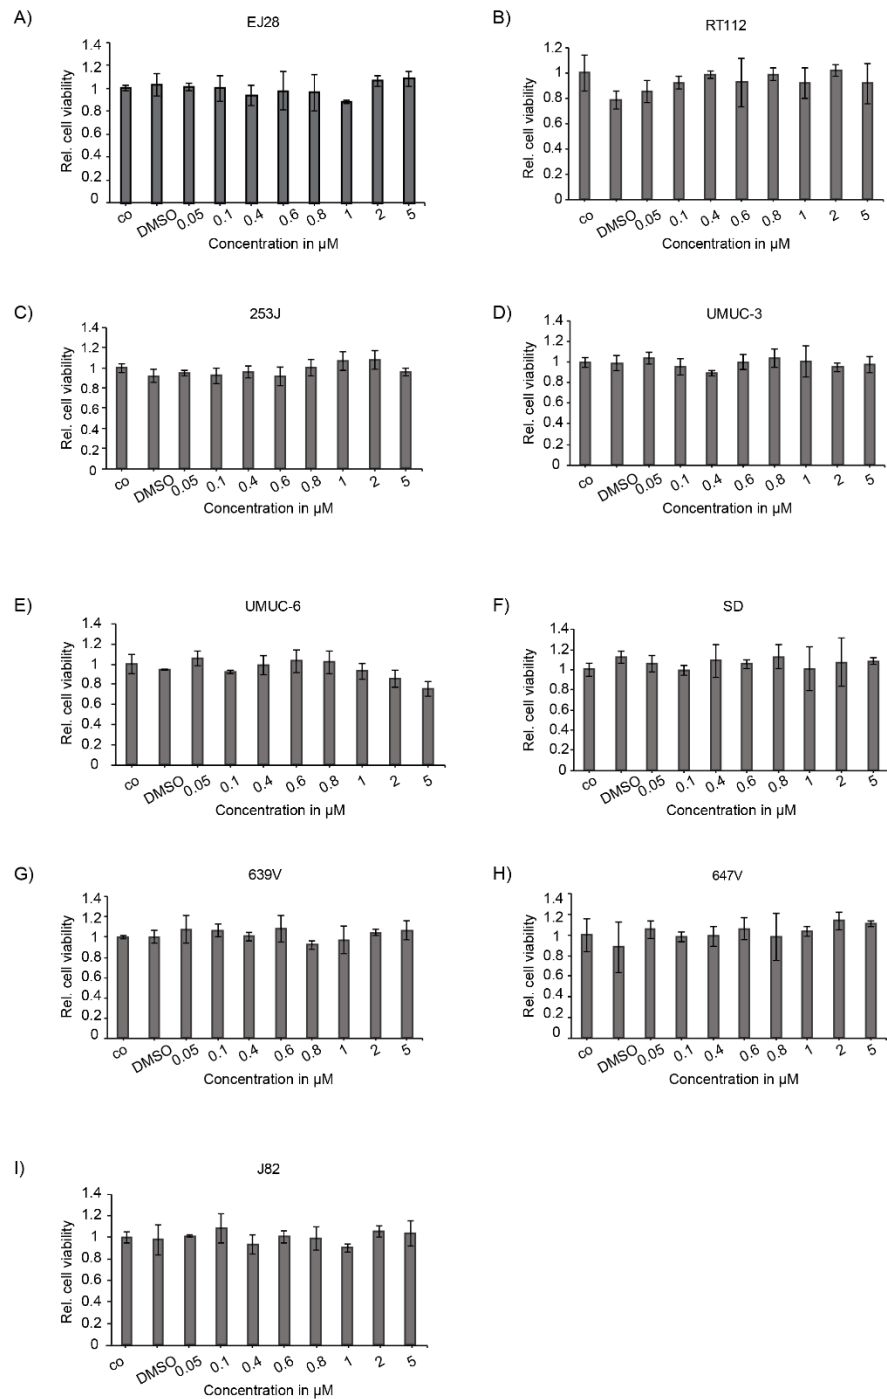

**Supplementary figure-S2:** JAK inhibition by specific inhibitors: Cells were treated with increasing concentrations of BSK-805 and cell viability was assessed by CellTiter-Blue® Cell Viability Assay 72 hours after treatment in a panel of bladder cancer cell lines: Error bars S.E.

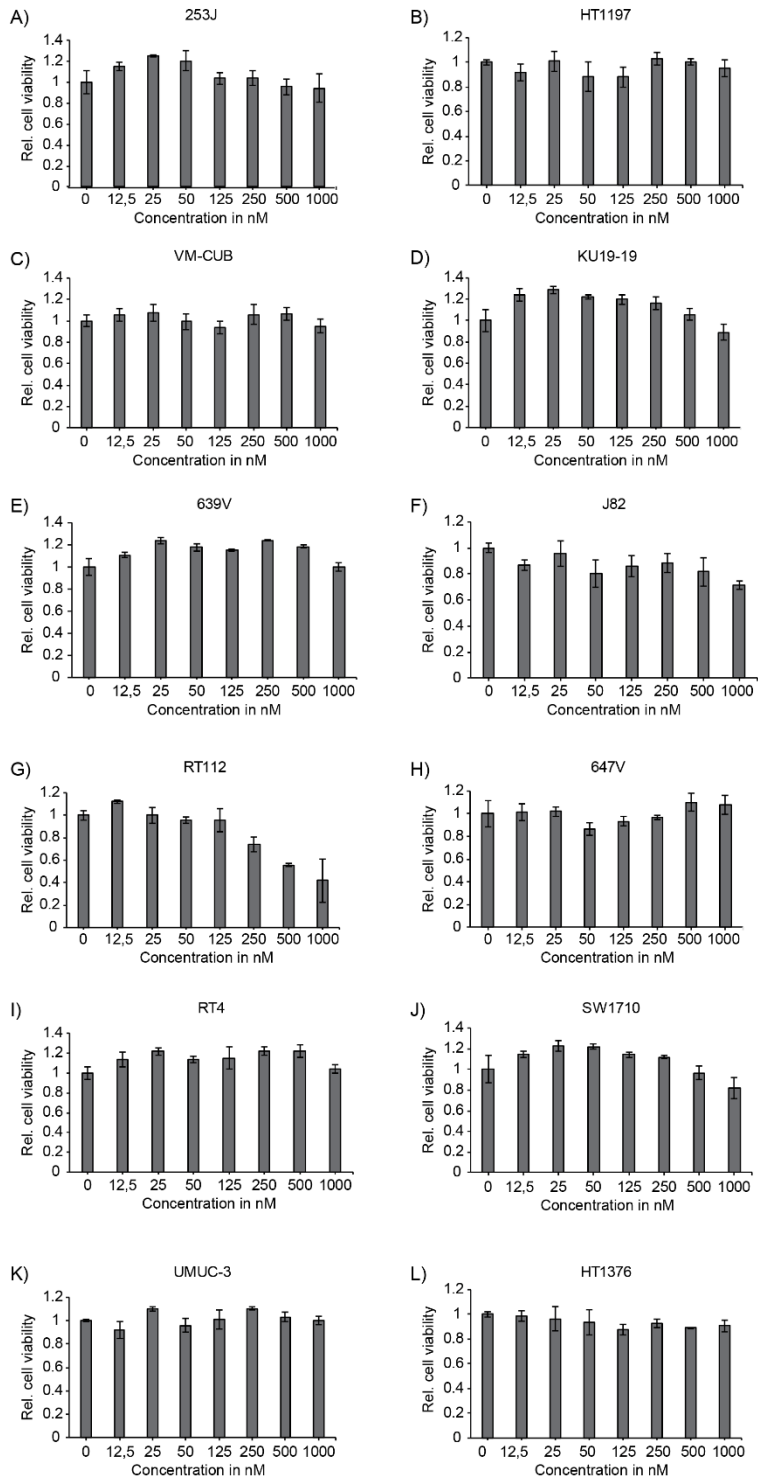

**Supplementary figure-S3:** STAT3/5 inhibition by specific inhibitors: Cells were treated with increasing concentrations of SH-4-54 and cell viability was assessed by CellTiter-Blue® Cell Viability Assay 72 hours after treatment in a panel of bladder cancer cell lines: Error bars S.E.

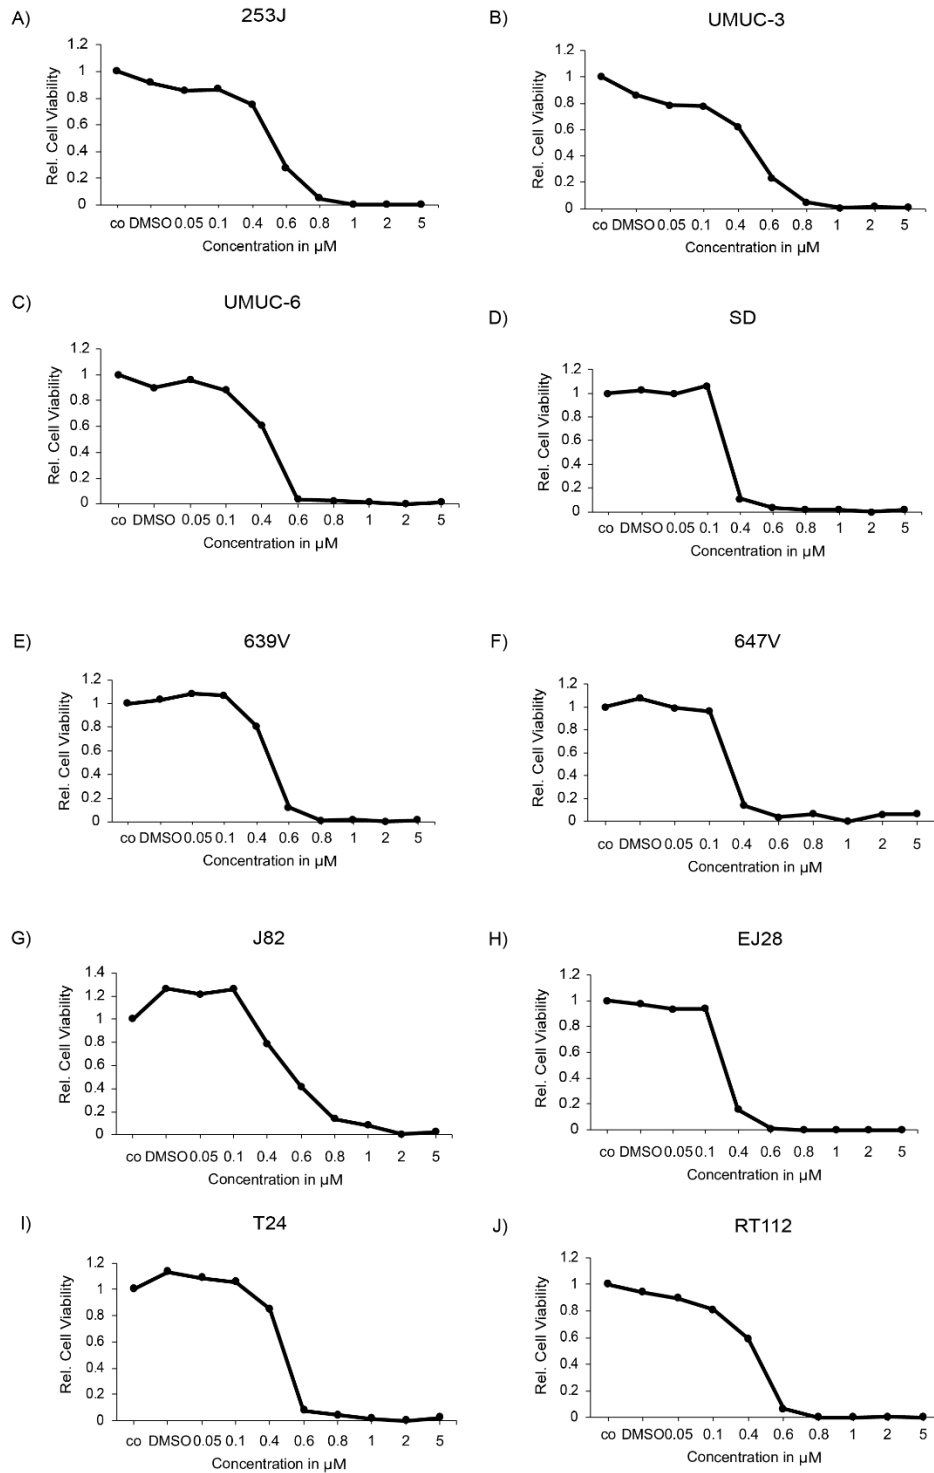

**Supplementary figure-S4:** STAT3/5 inhibition by specific inhibitors: Cells were treated with increasing concentrations of Nifuroxazide and cell viability was assessed by CellTiter-Blue® Cell Viability Assay 72 hours after treatment in T24 (A) and RT112 (B) cells. Error bars S.E.

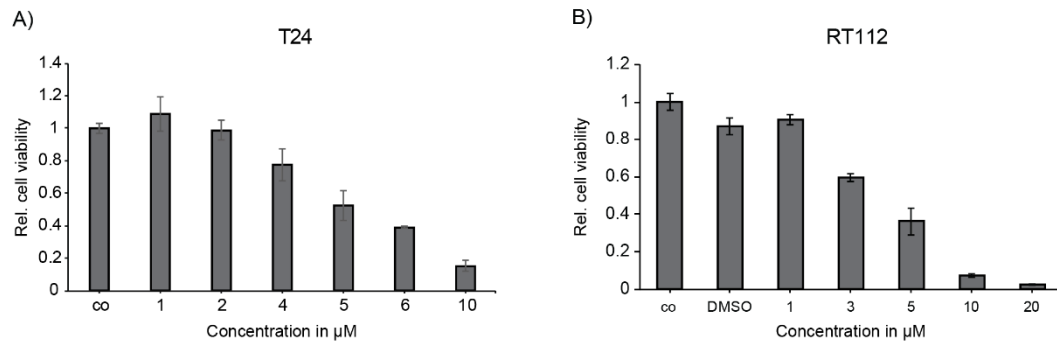

**Supplementary figure-S5: STAT3/5 inhibition by specific inhibitors:** Cells were treated with increasing concentrations of Stattic and cell viability was assessed by CellTiter-Blue® Cell Viability Assay 72 hours after treatment in a panel of bladder cancer cell lines: Error bars S.E.

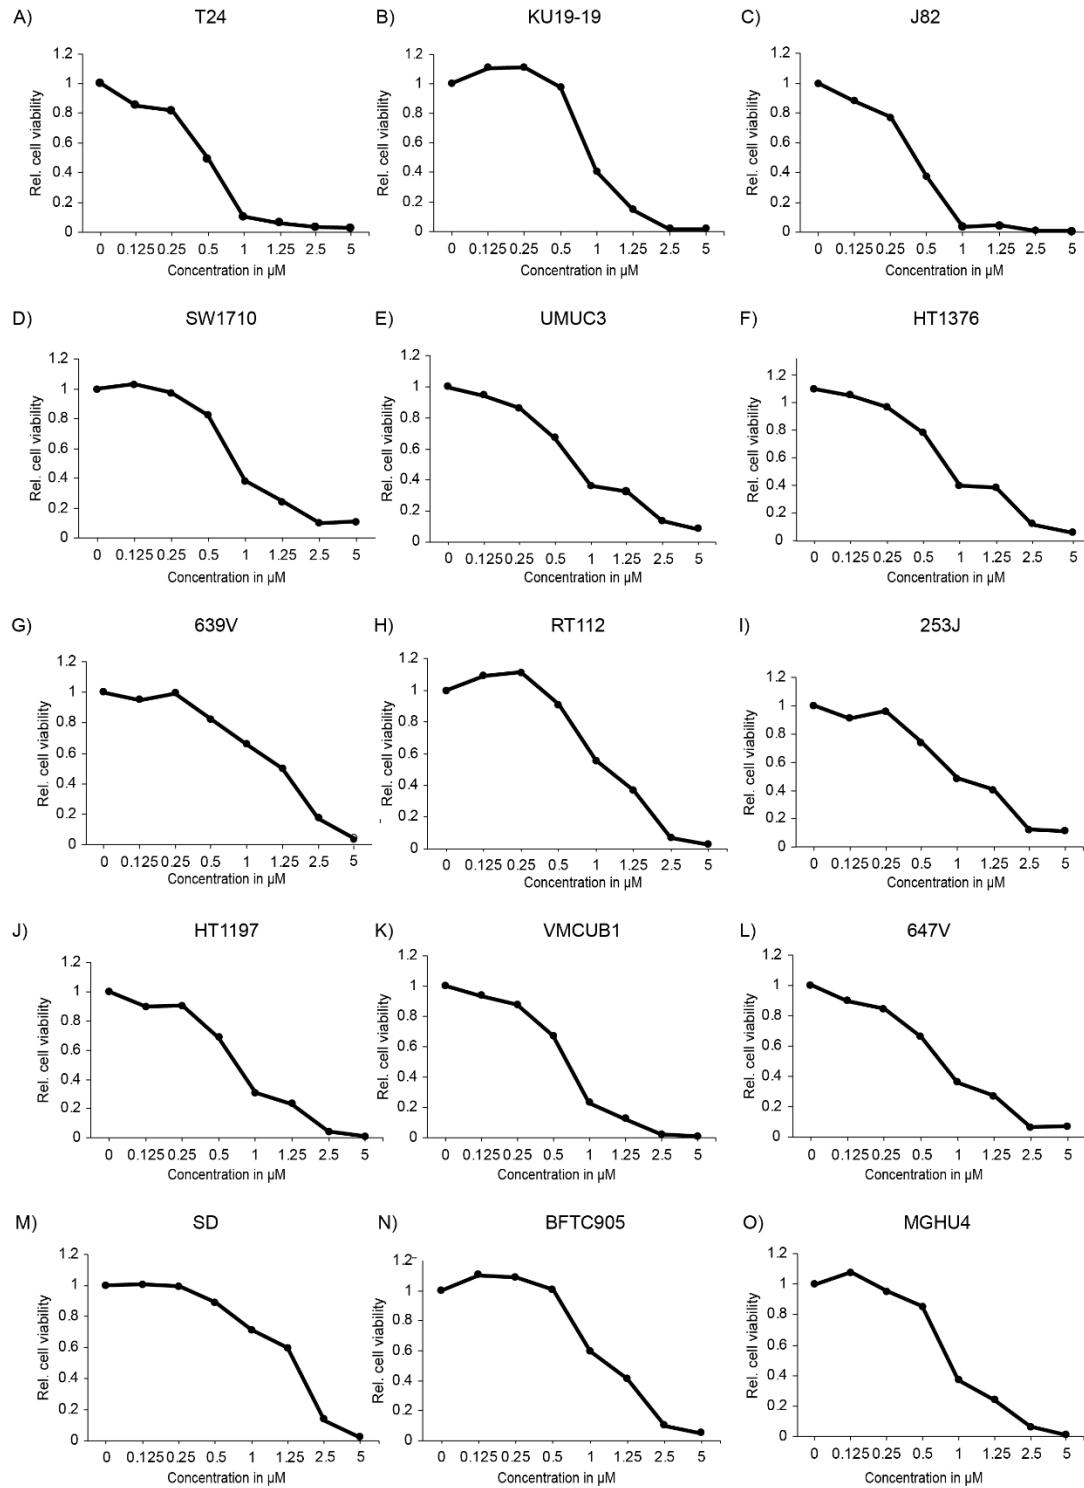

P) 486P

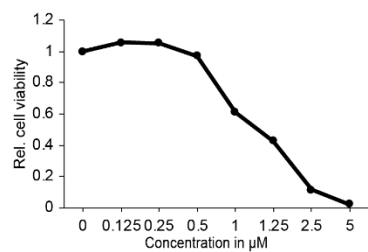

Q) UMUC6

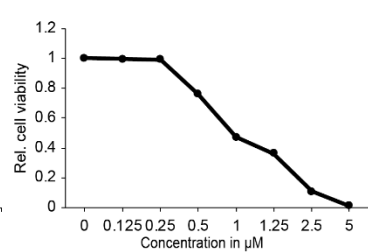

R) EJ28

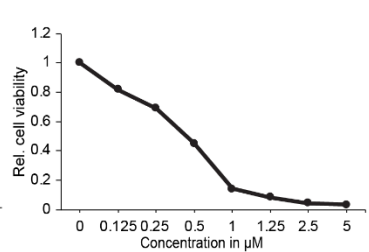

S) HCV29

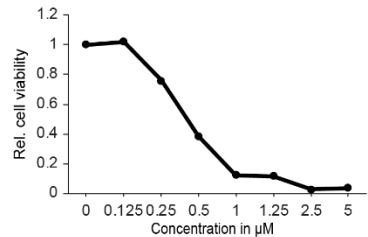

T) BTE5

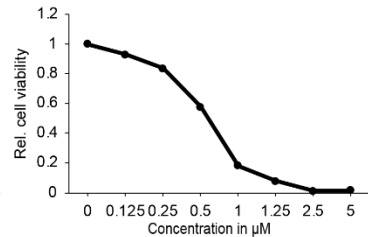

U) RT4

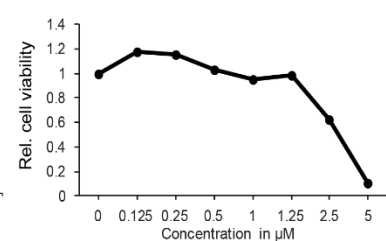

**Supplementary figure-S6:** Dose response curves for combination therapy with Stattic and chemotherapeutics: Treatment of the respective cell lines was done for 72 hours with Stattic alone and in a fixed ratio combination with Paclitaxel, Cisplatin, Gemcitabine or Docetaxel in T24, J82, HT1376, RT112, and SD cell lines (See Materials and methods) and cell viability was assessed by CellTiter-Blue® Cell Viability Assay 72 hours after treatment. Error bars S.E.

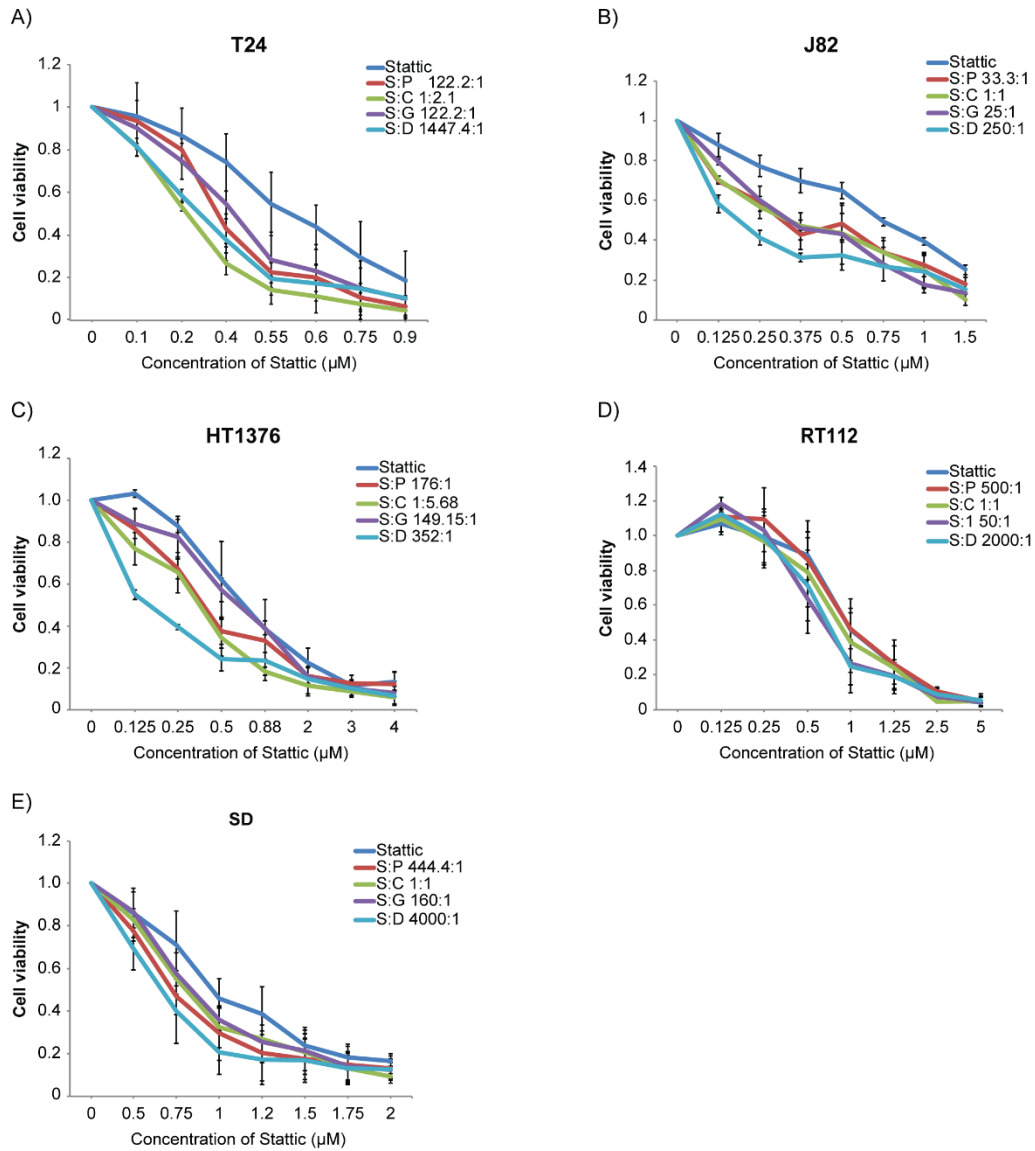

**Supplementary table-1:** Alterations in the JAK-STAT signalling pathway related genes in bladder cancer in the TCGA dataset.

| S.No | Gene symbol | Alteration in gene expression (n= 412) |    |
|------|-------------|----------------------------------------|----|
|      |             | Number of cases with alterations       | %  |
| 1    | JAK1        | 29                                     | 7  |
| 2    | JAK2        | 54                                     | 13 |
| 3    | JAK3        | 32                                     | 8  |
| 4    | TYK2        | 28                                     | 7  |
| 5    | STAT1       | 42                                     | 10 |
| 6    | STAT2       | 21                                     | 5  |
| 7    | STAT3       | 29                                     | 7  |
| 8    | STAT4       | 33                                     | 8  |
| 9    | STAT5a      | 38                                     | 9  |
| 10   | STAT5b      | 24                                     | 6  |
| 11   | STAT6       | 27                                     | 7  |

**Supplementary table-2:** Co-occurrence of altered genes in the JAK-STAT pathway in the TCGA dataset.

| Gene A | Gene B | Neither A nor B | A Not B | B Not A | Both A and B | Log2 Odds Ratio | p-Value | Tendency      |
|--------|--------|-----------------|---------|---------|--------------|-----------------|---------|---------------|
| STAT3  | STAT5A | 289             | 15      | 22      | 10           | >3              | <0.001  | Co-occurrence |
| JAK2   | STAT5A | 263             | 41      | 18      | 14           | 2.319           | <0.001  | Co-occurrence |
| STAT3  | STAT5B | 294             | 18      | 17      | 7            | 2.75            | <0.001  | Co-occurrence |
| STAT5A | STAT5B | 287             | 25      | 17      | 7            | 2.241           | 0.004   | Co-occurrence |
| JAK2   | STAT3  | 265             | 46      | 16      | 9            | 1.696           | 0.011   | Co-occurrence |
| JAK1   | STAT3  | 289             | 22      | 19      | 6            | 2.053           | 0.011   | Co-occurrence |
