# Supplementary material for: STAT3/5 Inhibitors Suppress Proliferation in Bladder Cancer and Enhance Oncolytic Adenovirus Therapy
Source: MDPI journal article supplement (doi:10.3390/ijms21031106), 2020-02-07
Supplement: s1 [file s1]

| Gene A | Gene B | Neither A nor B | A Not B | B Not A | Both A and B | Log2 Odds Ratio | p-Value | Tendency      |
|--------|--------|-----------------|---------|---------|--------------|-----------------|---------|---------------|
| STAT3  | STAT5A | 289             | 15      | 22      | 10           | >3              | <0.001  | Co-occurrence |
| JAK2   | STAT5A | 263             | 41      | 18      | 14           | 2.319           | <0.001  | Co-occurrence |
| STAT3  | STAT5B | 294             | 18      | 17      | 7            | 2.75            | <0.001  | Co-occurrence |
| STAT5A | STAT5B | 287             | 25      | 17      | 7            | 2.241           | 0.004   | Co-occurrence |
| JAK2   | STAT3  | 265             | 46      | 16      | 9            | 1.696           | 0.011   | Co-occurrence |
| JAK1   | STAT3  | 289             | 22      | 19      | 6            | 2.053           | 0.011   | Co-occurrence |
