# Supplementary material for: STAT3/5 Inhibitors Suppress Proliferation in Bladder Cancer and Enhance Oncolytic Adenovirus Therapy
Source: MDPI journal article supplement (doi:10.3390/ijms21031106), 2020-02-07
Supplement: s1 [file s1]

| <b>S.No</b> | <b>Gene symbol</b> | <b>Alteration in gene expression (n= 412)</b> |          |
|-------------|--------------------|-----------------------------------------------|----------|
|             |                    | <b>Number of cases with alterations</b>       | <b>%</b> |
| 1           | JAK1               | 29                                            | 7        |
| 2           | JAK2               | 54                                            | 13       |
| 3           | JAK3               | 32                                            | 8        |
| 4           | TYK2               | 28                                            | 7        |
| 5           | STAT1              | 42                                            | 10       |
| 6           | STAT2              | 21                                            | 5        |
| 7           | STAT3              | 29                                            | 7        |
| 8           | STAT4              | 33                                            | 8        |
| 9           | STAT5a             | 38                                            | 9        |
| 10          | STAT5b             | 24                                            | 6        |
| 11          | STAT6              | 27                                            | 7        |
