# Supplementary figures and images for: STAT3/5 Inhibitors Suppress Proliferation in Bladder Cancer and Enhance Oncolytic Adenovirus Therapy
Source: MDPI journal article supplement (doi:10.3390/ijms21031106), 2020-02-07

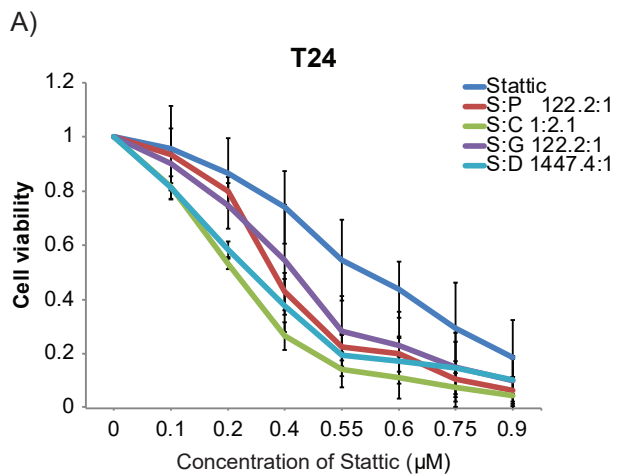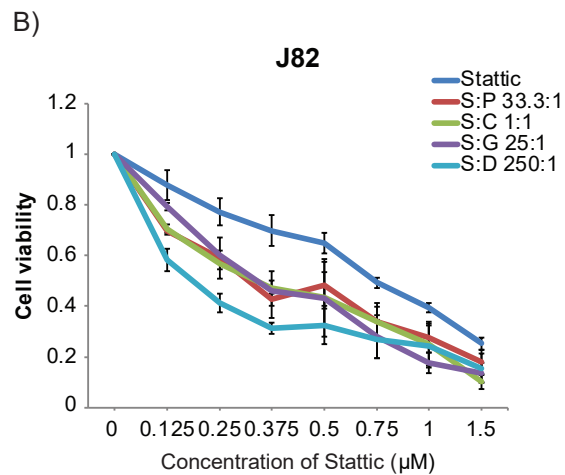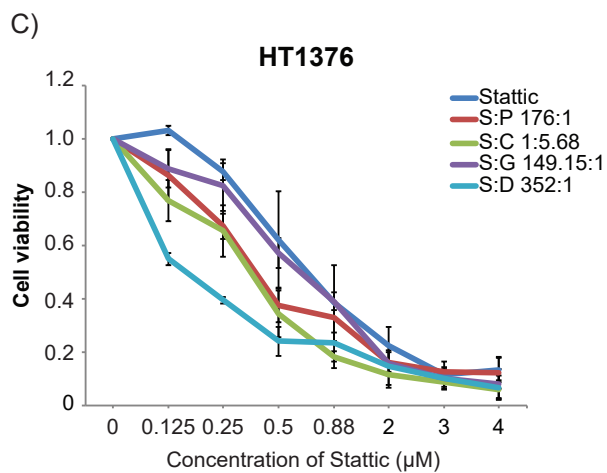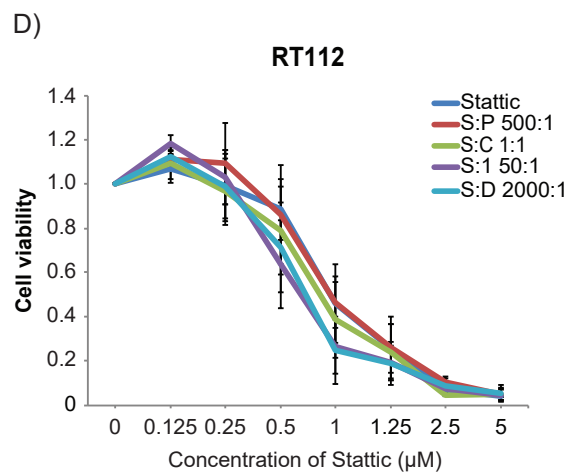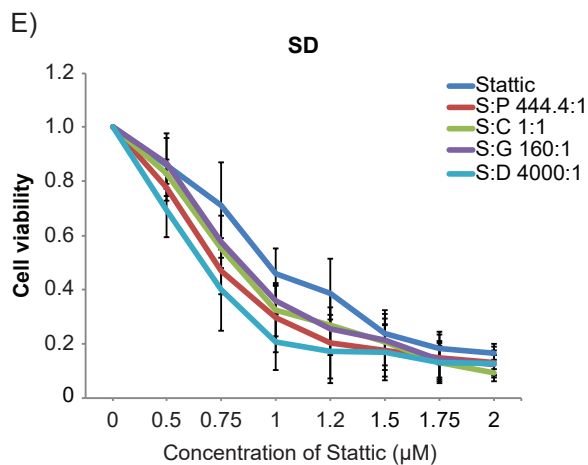

Supplement: s1 [file s1]

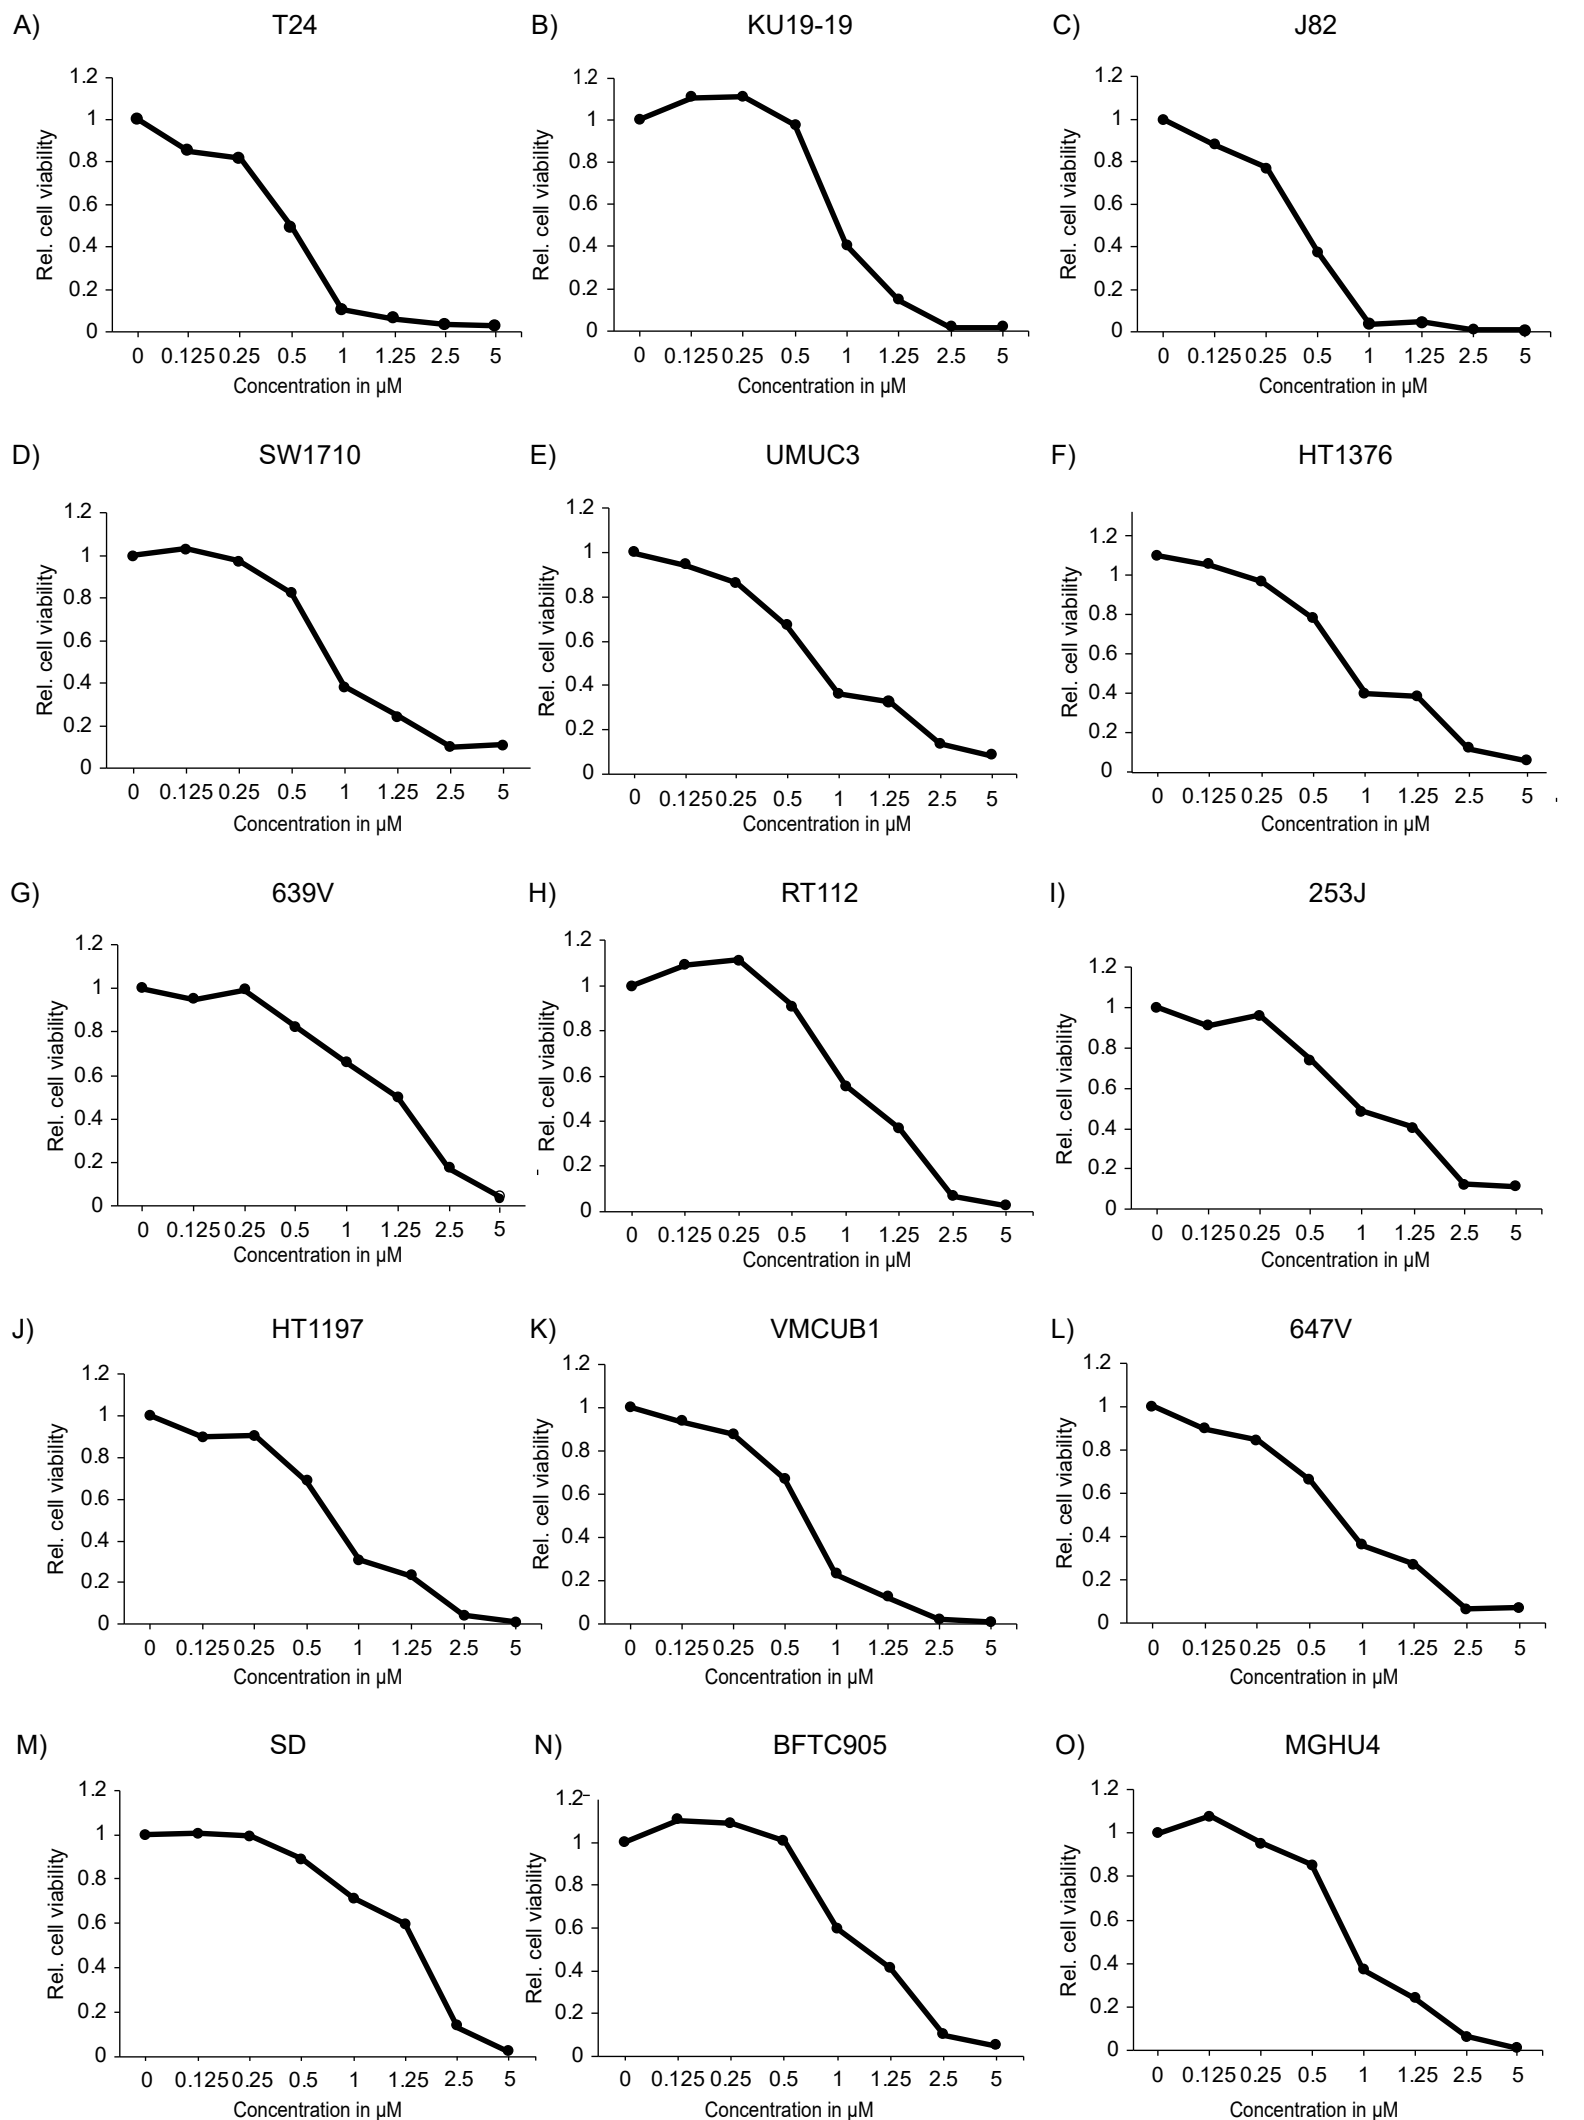

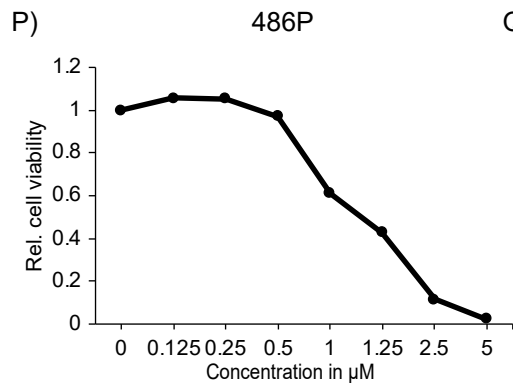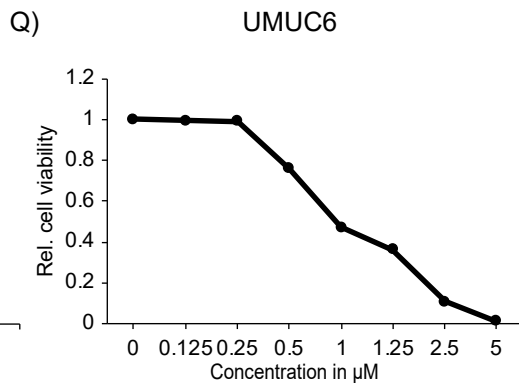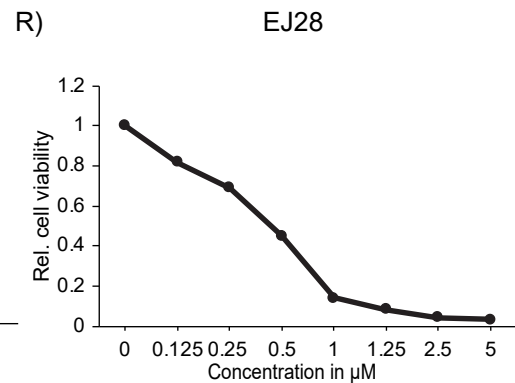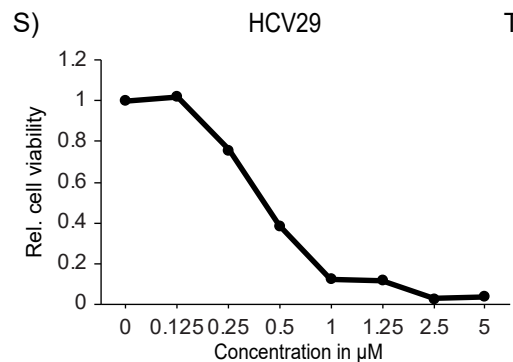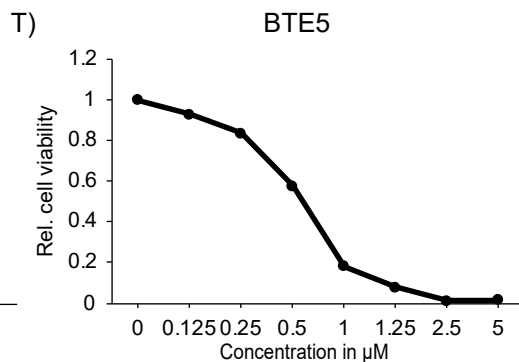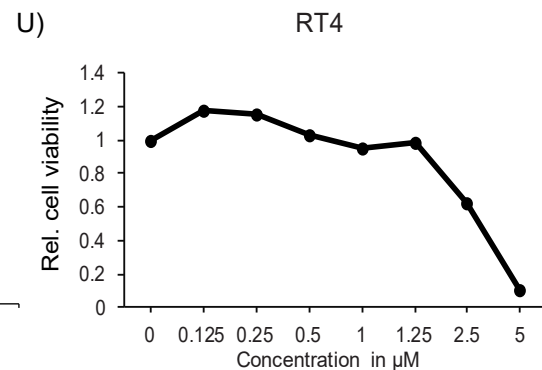

Supplement: s1 [file s1]

A)

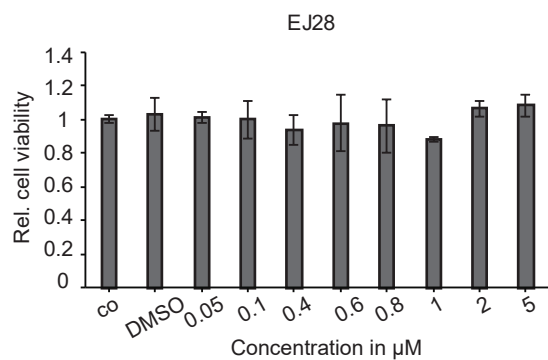

B)

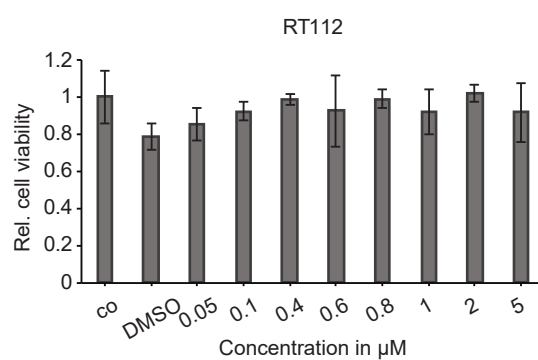

C)

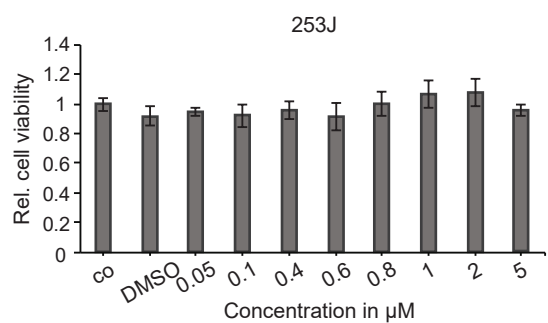

D)

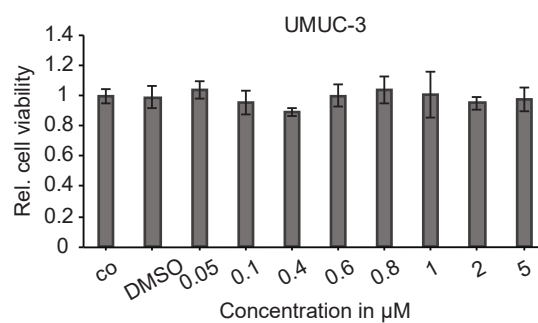

E)

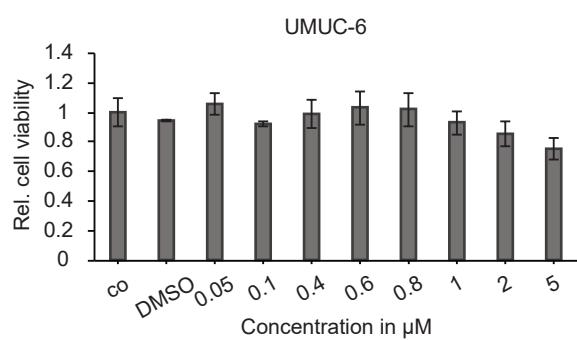

F)

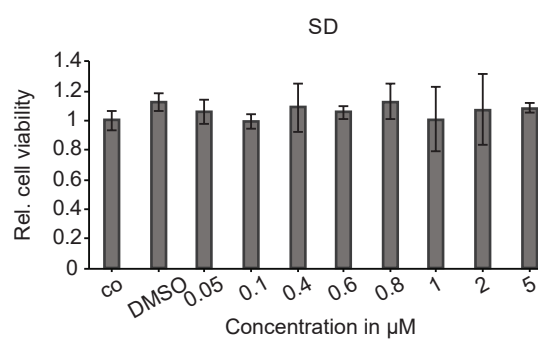

G)

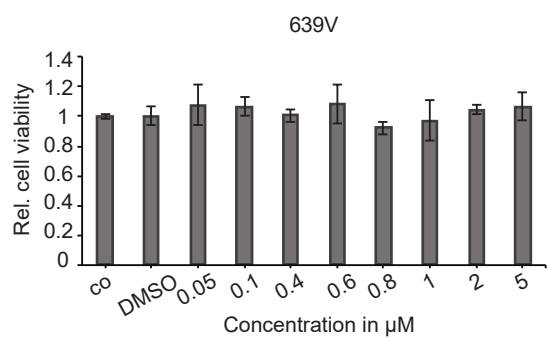

H)

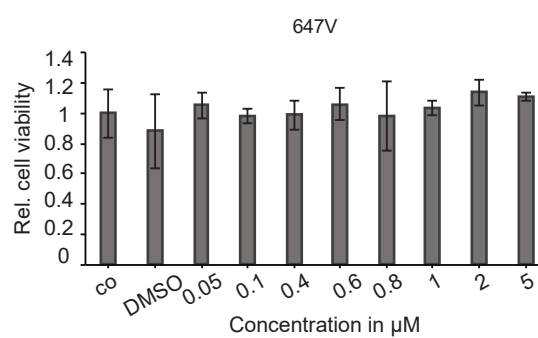

I)

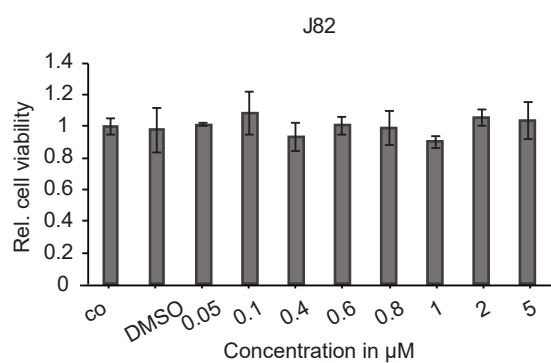

Supplement: s1 [file s1]

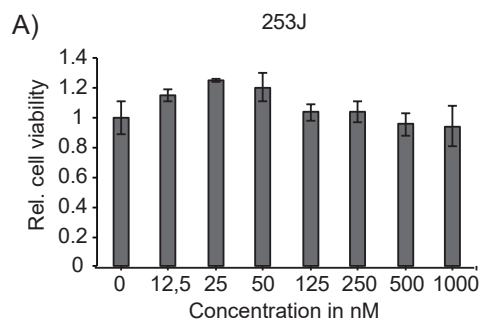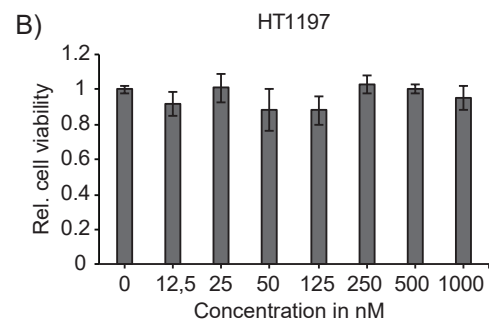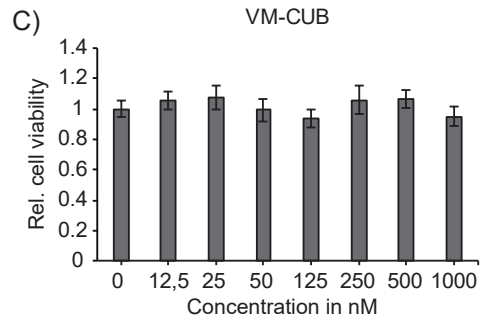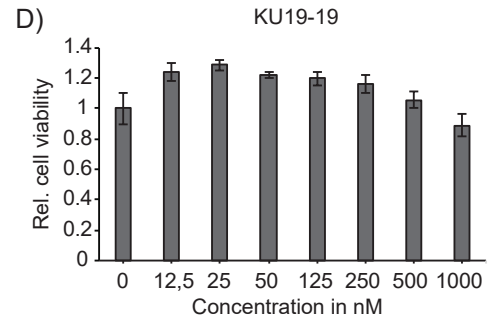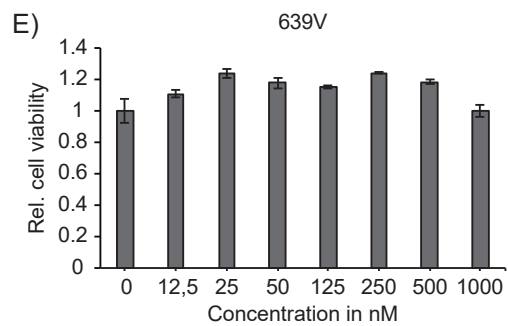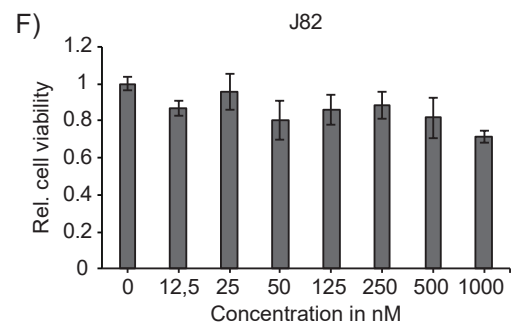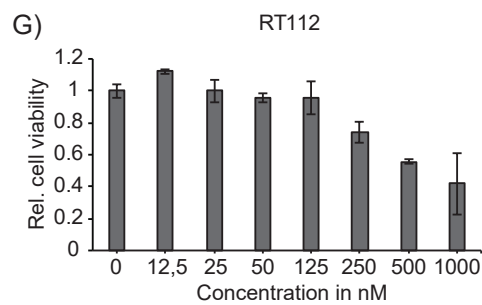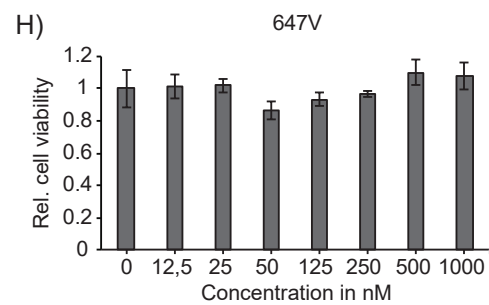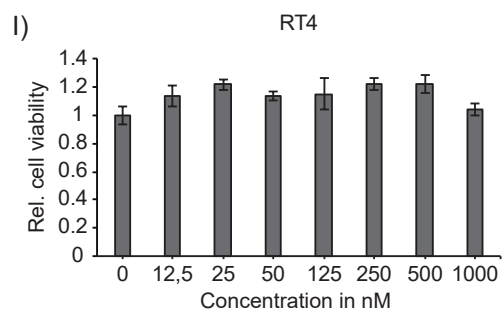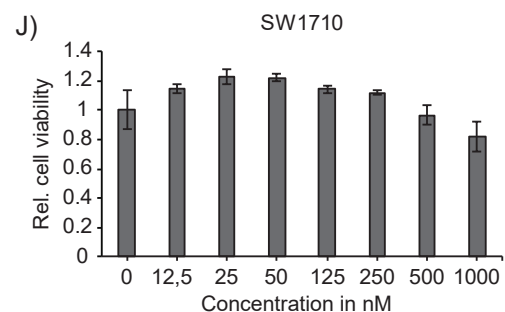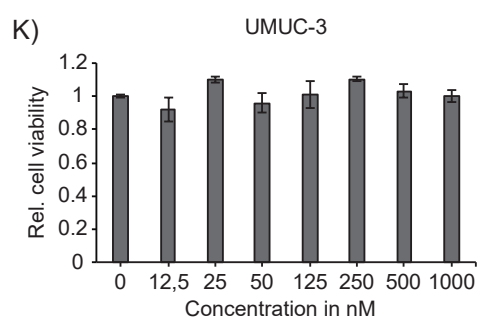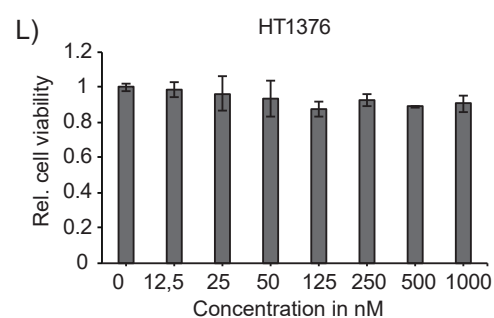

Supplement: s1 [file s1]

A)

T24

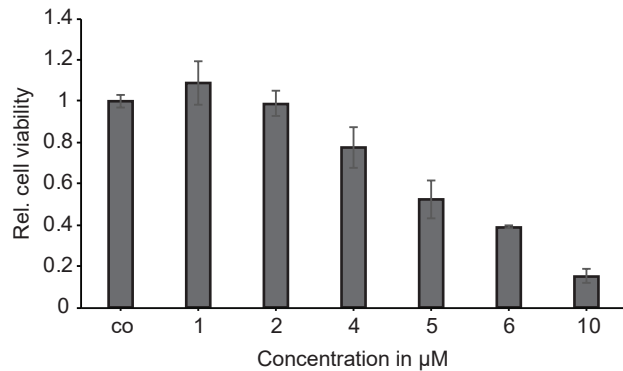

B)

RT112

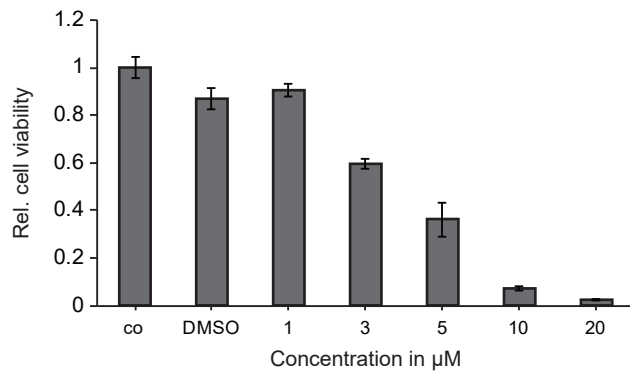

Supplement: s1 [file s1]

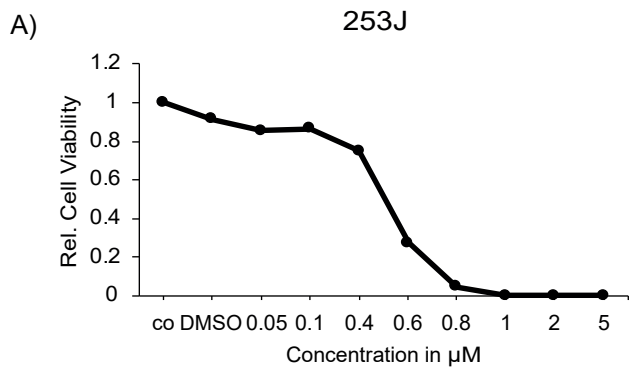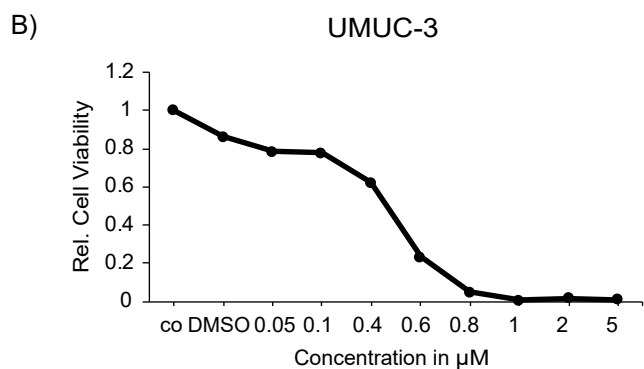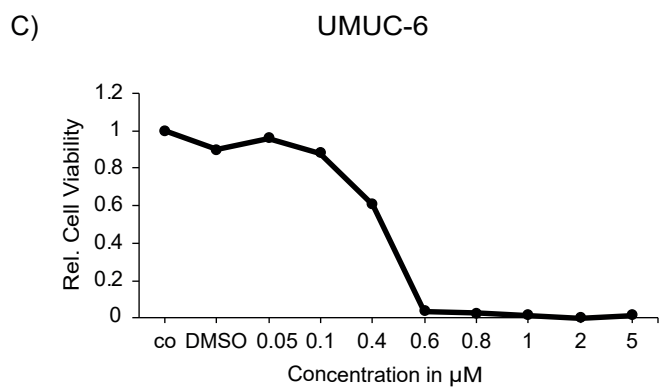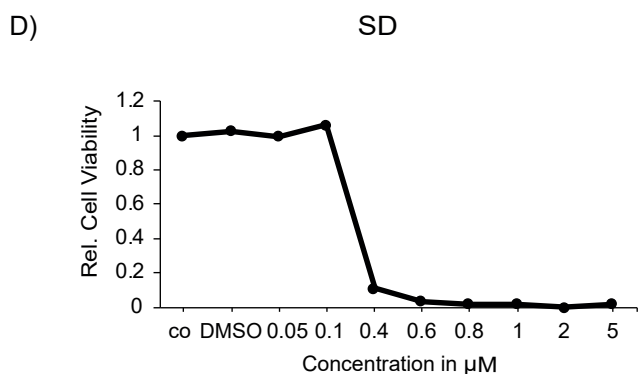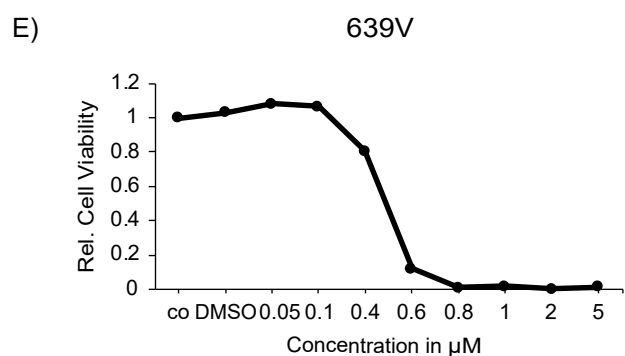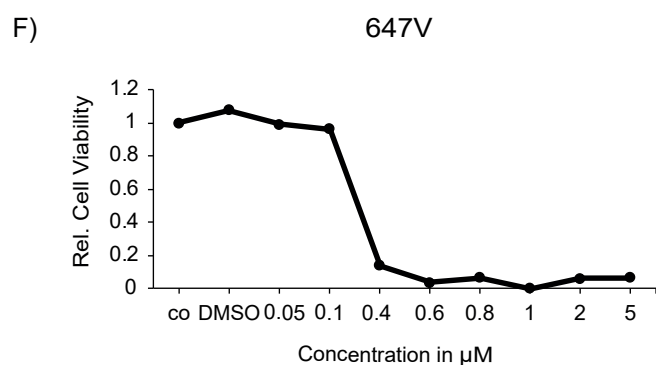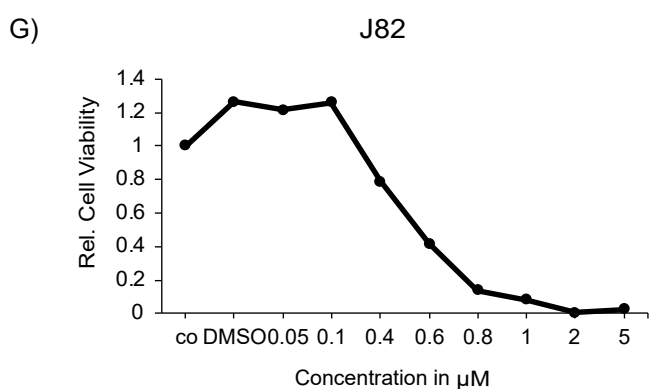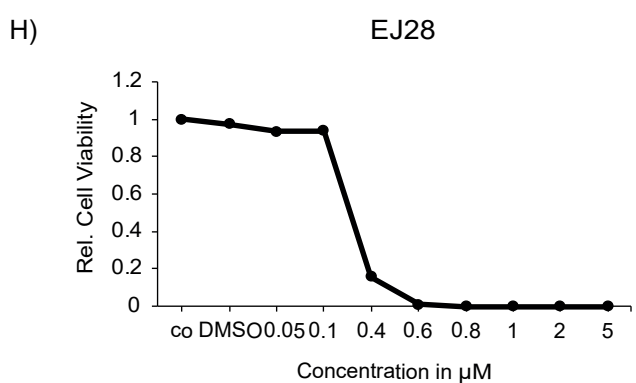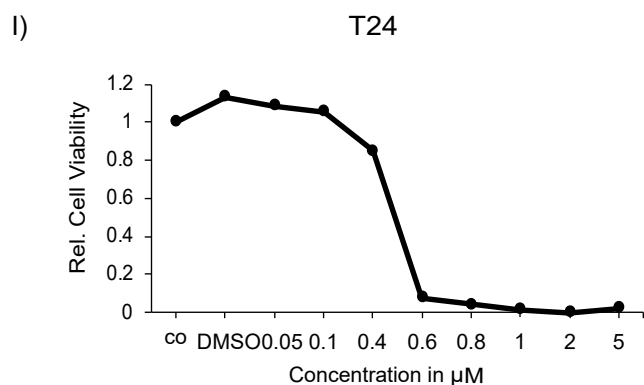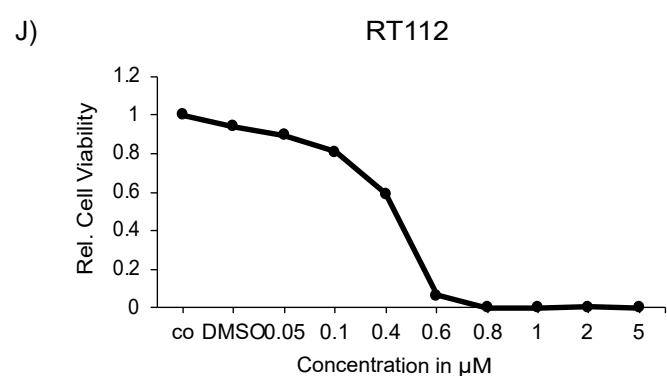

Supplement: s1 [file s1]
